# Supplementary material
Source: Royal Society of Chemistry journal article supplement (doi:10.1039/d6se00279j)
Supplement: d6se00279j1.pdf [file d6se00279j1.pdf]

## In-Situ Ge/Zn<sub>2</sub>GeO<sub>4</sub> Heterojunctions Coupled with a Rigid-Flexible TiO<sub>2</sub>/NC Dual Coating for High-Performance Lithium-Ion Battery

### Anodes

Kun Peng,<sup>a</sup> Qiushi Huang,<sup>a</sup> Xintong Xu<sup>\*b</sup> and Rujia Zou<sup>\*a</sup>

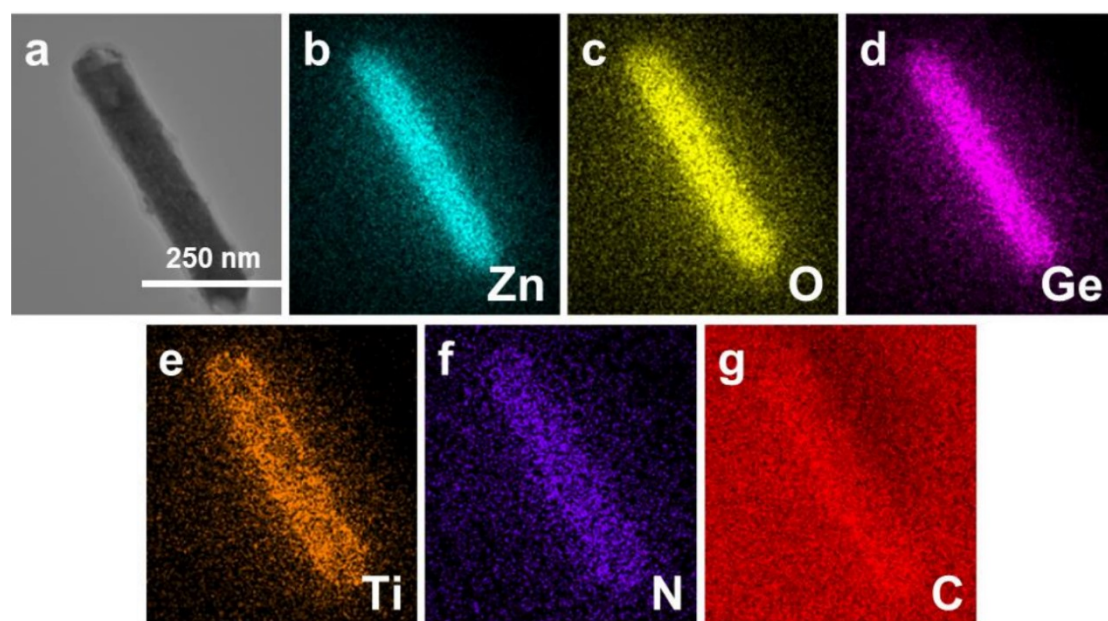

Figure S1 EDS elemental analysis of Ge/Zn<sub>2</sub>GeO<sub>4</sub>@TiO<sub>2</sub>@NC

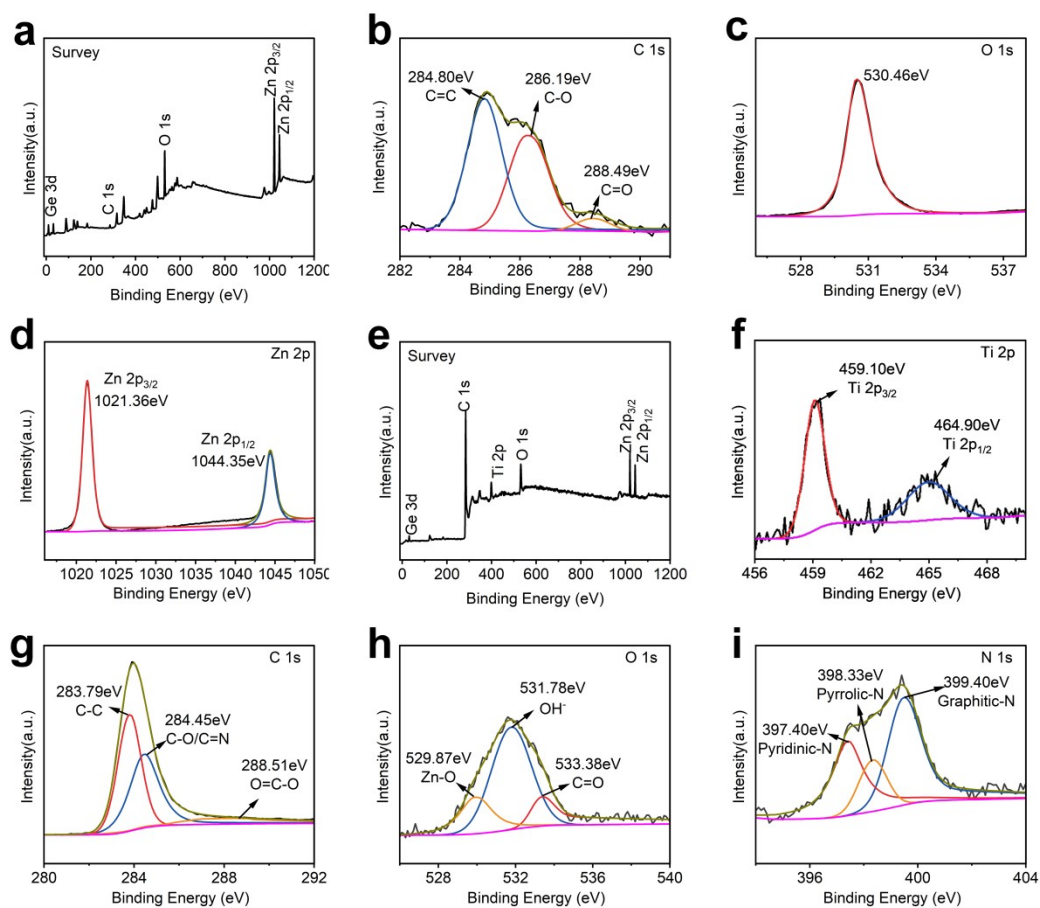

Figure S2 XPS elemental analysis of (a-d)  $\text{Zn}_2\text{GeO}_4$  and (e-i)  $\text{Ge}/\text{Zn}_2\text{GeO}_4@\text{TiO}_2@\text{NC}$

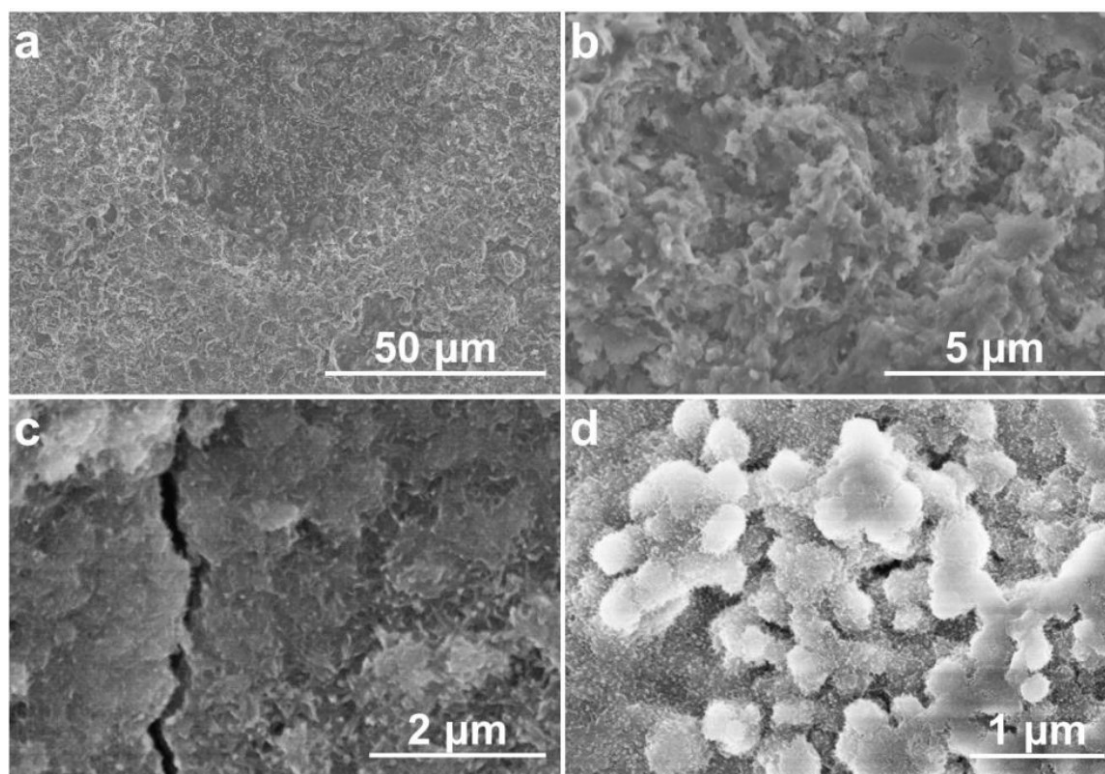

Figure S3 SEM images of the  $\text{Ge}/\text{Zn}_2\text{GeO}_4@\text{TiO}_2@\text{NC}$  electrode (a, b) and the  $\text{Ge}/\text{Zn}_2\text{GeO}_4@\text{TiO}_2$

electrode (c, d) after 600 cycles
